# Supplementary material for: Investigation of the Effectiveness of Metformin and Various Antibiotic Combinations against Pseudomonas aeruginosa Isolates
Source: Preprints.org preprint supplement (doi:10.20944/preprints202403.0521.v1), 2024-03-08
Supplement: Supplementary file 1 [file supplementary]

**Supplementary table A1.** MIC values and synergy test results of ceftasidime and metformin

| **Isolate number** | **MİC value (µg/mL)** | | | | **FICI** | **Result** |
| --- | --- | --- | --- | --- | --- | --- |
| **Ceftasidime** | **Met** | **Ceftasidime in combination** | **Metformin in combination** |
| 1 | 5 | >512 | 2.5 | >512 | 1.5 | Undifferentiated |
| 2 | 5 | >512 | 5 | >512 | 2 | Undifferentiated |
| 3 | 20 | >512 | 20 | >512 | 2 | Undifferentiated |
| 4 | 160 | >512 | 160 | >512 | 2 | Undifferentiated |
| 5 | 5 | >512 | 5 | >512 | 2 | Undifferentiated |
| 6 | 160 | >512 | 160 | >512 | 2 | Undifferentiated |
| 7 | 5 | >512 | 5 | >512 | 2 | Undifferentiated |
| 8 | 320 | >512 | 320 | >512 | 2 | Undifferentiated |
| 9 | 5 | >512 | 2.5 | >512 | 1.5 | Undifferentiated |
| 10 | 20 | >512 | 2.5 | >512 | 1.25 | Undifferentiated |
| 11 | 20 | >512 | 10 | 8 | 0.52 | Partial sinergy |
| 12 | 40 | >512 | 40 | >512 | 2 | Undifferentiated |
| 13 | 320 | >512 | 320 | >512 | 2 | Undifferentiated |
| 14 | 160 | >512 | 160 | >512 | 2 | Undifferentiated |
| 15 | 2.5 | >512 | 1.25 | 256 | 1 | Partial sinergy |
| 16 | 5 | >512 | 5 | >512 | 2 | Undifferentiated |
| 17 | 5 | >512 | 1.25 | 64 | 0.38 | **Sinergy** |
| 18 | 10 | >512 | 5 | 16 | 0.53 | Partial sinergy |
| 19 | 320 | >512 | 320 | >512 | 2 | Undifferentiated |
| 20 | 320 | >512 | 320 | >512 | 2 | Undifferentiated |
| 21 | 320 | >512 | 320 | >512 | 2 | Undifferentiated |
| 22 | 160 | >512 | 80 | 64 | 0.51 | Partial sinergy |
| 23 | 10 | >512 | 1.25 | >512 | 1.13 | Undifferentiated |
| 24 | 2.5 | >512 | 1.25 | >512 | 1.5 | Undifferentiated |
| 25 | 1.25 | >512 | 2.5 | >512 | 3 | Undifferentiated |
| 26 | 5 | >512 | 1.25 | 128 | 0.5 | **Sinergy** |
| 27 | 5 | >512 | 5 | >512 | 2 | Undifferentiated |
| 28 | 320 | >512 | 320 | >512 | 2 | Undifferentiated |
| 29 | 20 | >512 | 20 | >512 | 2 | Undifferentiated |
| 30 | 40 | >512 | 40 | >512 | 2 | Undifferentiated |
| 31 | 5 | >512 | 2.5 | 256 | 1 | Partial sinergy |
| 32 | 20 | >512 | 20 | >512 | 2 | Undifferentiated |
| 33 | 320 | >512 | 320 | >512 | 2 | Undifferentiated |
| 34 | 320 | >512 | 320 | >512 | 2 | Undifferentiated |
| 35 | 10 | >512 | 5 | 256 | 1 | Partial sinergy |
| 36 | 10 | >512 | 10 | >512 | 2 | Undifferentiated |
| 37 | 5 | >512 | 5 | >512 | 2 | Undifferentiated |
| 38 | 5 | >512 | 2.5 | 256 | 1 | Partial sinergy |
| 39 | 5 | >512 | 5 | >512 | 2 | Undifferentiated |
| 40 | 10 | >512 | 5 | 256 | 1 | Partial sinergy |
| 41 | 10 | >512 | 5 | 256 | 1 | Partial sinergy |
| 42 | 20 | >512 | 10 | 256 | 1 | Partial sinergy |
| 43 | 5 | >512 | 4 | >512 | 2 | Undifferentiated |
| 44 | 20 | >512 | 20 | >512 | 2 | Undifferentiated |
| 45 | 20 | >512 | 20 | >512 | 2 | Undifferentiated |
| 46 | 5 | >512 | 5 | >512 | 2 | Undifferentiated |
| 47 | 10 | >512 | 2.5 | 16 | 0.28 | **Sinergy** |
| 48 | 5 | >512 | 5 | >512 | 2 | Undifferentiated |
| 49 | 80 | >512 | 40 | 256 | 1 | Partial sinergy |
| 50 | 20 | >512 | 20 | >512 | 2 | Undifferentiated |

MİC: minimum inhibitory concentration, FIKI: fractional inhibitor concentration index, Met: metformin

**Supplementary table A2.** MIC values and synergy test results of cefepime and metformin

| **Isolate number** | **MİC value (µg/mL)** | | | | **FICI** | **Result** |
| --- | --- | --- | --- | --- | --- | --- |
| **Cefepime** | **Met** | **Cefepime in combination** | **Metformin in combination** |
| 1 | 5 | >512 | 2.5 | 256 | 1 | Partial sinergy |
| 2 | 5 | >512 | 2.5 | 256 | 1 | Partial sinergy |
| 3 | 20 | >512 | 20 | >512 | 2 | Undifferentiated |
| 4 | 80 | >512 | 40 | >512 | 1.5 | Undifferentiated |
| 5 | 20 | >512 | 10 | >512 | 1.5 | Undifferentiated |
| 6 | 80 | >512 | 40 | >512 | 1.5 | Undifferentiated |
| 7 | 10 | >512 | 2.5 | >512 | 1.25 | Undifferentiated |
| 8 | 320 | >512 | 320 | >512 | 2 | Undifferentiated |
| 9 | 5 | >512 | 2.5 | 64 | 0.51 | Partial sinergy |
| 10 | 20 | >512 | 5 | >512 | 1.25 | Undifferentiated |
| 11 | 10 | >512 | 5 | 256 | 1 | Partial sinergy |
| 12 | 20 | >512 | 10 | 256 | 1 | Partial sinergy |
| 13 | 80 | >512 | 40 | 256 | 1 | Partial sinergy |
| 14 | 80 | >512 | 40 | >512 | 1.5 | Undifferentiated |
| 15 | 2.5 | >512 | 1.25 | 256 | 1 | Partial sinergy |
| 16 | 2.5 | >512 | 2.5 | >512 | 2 | Undifferentiated |
| 17 | 10 | >512 | 2.5 | 256 | 0.75 | Partial sinergy |
| 18 | 320 | >512 | 320 | >512 | 2 | Undifferentiated |
| 19 | 160 | >512 | 80 | >512 | 1.5 | Undifferentiated |
| 20 | 320 | >512 | 320 | >512 | 2 | Undifferentiated |
| 21 | 160 | >512 | 160 | >512 | 2 | Undifferentiated |
| 22 | 160 | >512 | 80 | 32 | 0.56 | Partial sinergy |
| 23 | 80 | >512 | 80 | >512 | 2 | Undifferentiated |
| 24 | 1.25 | >512 | 1.25 | >512 | 2 | Undifferentiated |
| 25 | 0.6 | >512 | 0.3 | >512 | 1.5 | Undifferentiated |
| 26 | 10 | >512 | 5 | >512 | 1.5 | Undifferentiated |
| 27 | 5 | >512 | 2.5 | 256 | 1 | Partial sinergy |
| 28 | 80 | >512 | 80 | >512 | 2 | Undifferentiated |
| 29 | 20 | >512 | 10 | 32 | 0.56 | Partial sinergy |
| 30 | 20 | >512 | 10 | 256 | 1 | Partial sinergy |
| 31 | 10 | >512 | 2.5 | 256 | 0.75 | Partial sinergy |
| 32 | 10 | >512 | 10 | 256 | 1.5 | Undifferentiated |
| 33 | 80 | >512 | 80 | >512 | 2 | Undifferentiated |
| 34 | 80 | >512 | 40 | 32 | 0.56 | Partial sinergy |
| 35 | 5 | >512 | 2.5 | 256 | 1 | Partial sinergy |
| 36 | 10 | >512 | 5 | 256 | 1 | Partial sinergy |
| 37 | 2.5 | >512 | 1.25 | 64 | 0.75 | Partial sinergy |
| 38 | 5 | >512 | 2.5 | 256 | 1 | Partial sinergy |
| 39 | 5 | >512 | 2.5 | 256 | 1 | Partial sinergy |
| 40 | 160 | >512 | 80 | >512 | 1.5 | Undifferentiated |
| 41 | 20 | >512 | 10 | 256 | 1 | Partial sinergy |
| 42 | 20 | >512 | 10 | 256 | 1 | Partial sinergy |
| 43 | 16 | >512 | 8 | 64 | 0.625 | Partial sinergy |
| 44 | 20 | >512 | 20 | >512 | 2 | Undifferentiated |
| 45 | 20 | >512 | 20 | >512 | 2 | Undifferentiated |
| 46 | 5 | >512 | 2 | >512 | 2 | Undifferentiated |
| 47 | 10 | >512 | 5 | >512 | 1.5 | Undifferentiated |
| 48 | 2.5 | >512 | 2.5 | >512 | 2 | Undifferentiated |
| 49 | 40 | >512 | 20 | 256 | 1 | Partial sinergy |
| 50 | 20 | >512 | 20 | >512 | 2 | Undifferentiated |

MİC: minimum inhibitory concentration, FIKI: fractional inhibitor concentration index, Met: metformin

**Supplementary table A3.** MIC values and synergy test results of imipenem and metformin

| **Isolate number** | **MİC value (µg/mL)** | | | | **FICI** | **Result** |
| --- | --- | --- | --- | --- | --- | --- |
| **Imıpenem** | **Met** | **Imıpenem in combination** | **Metformin in combination** |
| 1 | 80 | >512 | 40 | 8 | 0.52 | Partial sinergy |
| 2 | 40 | >512 | 20 | >512 | 1.5 | Undifferentiated |
| 3 | 10 | >512 | 10 | >512 | 2 | Undifferentiated |
| 4 | 40 | >512 | 20 | 32 | 0.56 | Partial sinergy |
| 5 | 160 | >512 | 160 | >512 | 2 | Undifferentiated |
| 6 | 160 | >512 | 160 | >512 | 2 | Undifferentiated |
| 7 | 40 | >512 | 20 | >512 | 1.5 | Undifferentiated |
| 8 | 160 | >512 | 160 | >512 | 2 | Undifferentiated |
| 9 | 80 | >512 | 40 | >512 | 1.5 | Undifferentiated |
| 10 | 160 | >512 | 160 | >512 | 2 | Undifferentiated |
| 11 | 160 | >512 | 160 | >512 | 2 | Undifferentiated |
| 12 | 160 | >512 | 160 | >512 | 2 | Undifferentiated |
| 13 | 160 | >512 | 160 | >512 | 2 | Undifferentiated |
| 14 | 160 | >512 | 160 | >512 | 2 | Undifferentiated |
| 15 | 160 | >512 | 80 | >512 | 1.5 | Undifferentiated |
| 16 | 80 | >512 | 80 | >512 | 2 | Undifferentiated |
| 17 | 320 | >512 | 320 | >512 | 2 | Undifferentiated |
| 18 | 160 | >512 | 160 | >512 | 2 | Undifferentiated |
| 19 | 160 | >512 | 160 | >512 | 2 | Undifferentiated |
| 20 | 160 | >512 | 160 | >512 | 2 | Undifferentiated |
| 21 | 160 | >512 | 160 | >512 | 2 | Undifferentiated |
| 22 | 160 | >512 | 160 | >512 | 2 | Undifferentiated |
| 23 | 160 | >512 | 160 | >512 | 2 | Undifferentiated |
| 24 | 80 | >512 | 80 | >512 | 2 | Undifferentiated |
| 25 | 80 | >512 | 80 | >512 | 2 | Undifferentiated |
| 26 | 160 | >512 | 80 | >512 | 1.5 | Undifferentiated |
| 27 | 160 | >512 | 160 | >512 | 2 | Undifferentiated |
| 28 | 160 | >512 | 160 | >512 | 2 | Undifferentiated |
| 29 | 160 | >512 | 160 | >512 | 2 | Undifferentiated |
| 30 | 160 | >512 | 160 | >512 | 2 | Undifferentiated |
| 31 | 160 | >512 | 160 | >512 | 2 | Undifferentiated |
| 32 | 160 | >512 | 160 | >512 | 2 | Undifferentiated |
| 33 | 160 | >512 | 160 | >512 | 2 | Undifferentiated |
| 34 | 160 | >512 | 160 | >512 | 2 | Undifferentiated |
| 35 | 160 | >512 | 160 | >512 | 2 | Undifferentiated |
| 36 | 160 | >512 | 160 | >512 | 2 | Undifferentiated |
| 37 | 160 | >512 | 160 | >512 | 2 | Undifferentiated |
| 38 | 160 | >512 | 160 | >512 | 2 | Undifferentiated |
| 39 | 160 | >512 | 160 | >512 | 2 | Undifferentiated |
| 40 | 160 | >512 | 160 | >512 | 2 | Undifferentiated |
| 41 | 160 | >512 | 160 | >512 | 2 | Undifferentiated |
| 42 | 160 | >512 | 160 | >512 | 2 | Undifferentiated |
| 43 | 2 | >512 | 1 | 256 | 1 | Partial sinergy |
| 44 | 5 | >512 | 1.25 | 16 | 0.28 | **Sinergy** |
| 45 | 10 | >512 | 5 | 256 | 1 | Partial sinergy |
| 46 | 2.5 | >512 | 1.25 | 256 | 1 | Partial sinergy |
| 47 | 40 | >512 | 10 | 16 | 0.28 | **Sinergy** |
| 48 | 10 | >512 | 10 | >512 | 2 | Undifferentiated |
| 49 | 160 | >512 | 160 | >512 | 2 | Undifferentiated |
| 50 | 160 | >512 | 160 | >512 | 2 | Undifferentiated |

MİC: minimum inhibitory concentration, FIKI: fractional inhibitor concentration index, Met: metformin

**Supplementary table A4.** MIC values and synergy test results of ciprofloxacin and metformin

| **Isolate number** | **MİC value (µg/mL)** | | | | **FICI** | **Result** |
| --- | --- | --- | --- | --- | --- | --- |
| **Ciprofloxacin** | **Met** | **Ciprofloxicin in combination** | **Metformin in combination** |
| 1 | 0.5 | >512 | 0.5 | >512 | 2 | Undifferentiated |
| 2 | 0.5 | >512 | 0.5 | >512 | 2 | Undifferentiated |
| 3 | 16 | >512 | 16 | >512 | 2 | Undifferentiated |
| 4 | 0.5 | >512 | 0.25 | 8 | 0.52 | Partial sinergy |
| 5 | 16 | >512 | 16 | >512 | 2 | Undifferentiated |
| 6 | 0.25 | >512 | 0.25 | >512 | 2 | Undifferentiated |
| 7 | 0.5 | >512 | 0.5 | 32 | 1.06 | Undifferentiated |
| 8 | 16 | >512 | 16 | >512 | 2 | Undifferentiated |
| 9 | 0.25 | >512 | 0.25 | 32 | 1.06 | Undifferentiated |
| 10 | 4 | >512 | 4 | >512 | 2 | Undifferentiated |
| 11 | 0.5 | >512 | 0.5 | >512 | 2 | Undifferentiated |
| 12 | 16 | >512 | 16 | >512 | 2 | Undifferentiated |
| 13 | 16 | >512 | 16 | >512 | 2 | Undifferentiated |
| 14 | 1 | >512 | 0.5 | 256 | 1 | Partial sinergy |
| 15 | 0.06 | >512 | 0.06 | 4 | 1.01 | Undifferentiated |
| 16 | 0.125 | >512 | 0.125 | >512 | 2 | Undifferentiated |
| 17 | 0.125 | >512 | 0.5 | 4 | 4.01 | **Antagonist** |
| 18 | 1 | >512 | 1 | >512 | 2 | Undifferentiated |
| 19 | 16 | >512 | 16 | >512 | 2 | Undifferentiated |
| 20 | 16 | >512 | 16 | >512 | 2 | Undifferentiated |
| 21 | 16 | >512 | 16 | >512 | 2 | Undifferentiated |
| 22 | 16 | >512 | 16 | >512 | 2 | Undifferentiated |
| 23 | 16 | >512 | 16 | >512 | 2 | Undifferentiated |
| 24 | 2 | >512 | 0.5 | 8 | 0.27 | **Sinergy** |
| 25 | 0.015 | >512 | 0.03 | 64 | 0.27 | **Sinergy** |
| 26 | 0.25 | >512 | 0.25 | >512 | 2 | Undifferentiated |
| 27 | 1 | >512 | 0.25 | >512 | 1.25 | Undifferentiated |
| 28 | 16 | >512 | 16 | >512 | 2 | Undifferentiated |
| 29 | 8 | >512 | 4 | >512 | 1.5 | Undifferentiated |
| 30 | 4 | >512 | 2 | 16 | 0.53 | Partial sinergy |
| 31 | 0.25 | >512 | 0.25 | >512 | 2 | Undifferentiated |
| 32 | 8 | >512 | 8 | >512 | 2 | Undifferentiated |
| 33 | 16 | >512 | 16 | >512 | 2 | Undifferentiated |
| 34 | 16 | >512 | 16 | >512 | 2 | Undifferentiated |
| 35 | 1 | >512 | 1 | >512 | 2 | Undifferentiated |
| 36 | 0.5 | >512 | 0.5 | >512 | 2 | Undifferentiated |
| 37 | 1 | >512 | 1 | >512 | 2 | Undifferentiated |
| 38 | 0.5 | >512 | 0.5 | >512 | 2 | Undifferentiated |
| 39 | 0.25 | >512 | 0.25 | >512 | 2 | Undifferentiated |
| 40 | 16 | >512 | 16 | >512 | 2 | Undifferentiated |
| 41 | 16 | >512 | 16 | >512 | 2 | Undifferentiated |
| 42 | 1 | >512 | 1 | >512 | 2 | Undifferentiated |
| 43 | 0.25 | >512 | 0.125 | 8 | 1.02 | Undifferentiated |
| 44 | 0.125 | >512 | 0.25 | 8 | 2.02 | Undifferentiated |
| 45 | 16 | >512 | 16 | >512 | 2 | Undifferentiated |
| 46 | 2 | >512 | 2 | >512 | 2 | Undifferentiated |
| 47 | 0.25 | >512 | 0.06 | 32 | 0.3 | **Sinergy** |
| 48 | 0.125 | >512 | 0.125 | >512 | 2 | Undifferentiated |
| 49 | 16 | >512 | 16 | >512 | 2 | Undifferentiated |
| 50 | 16 | >512 | 16 | >512 | 2 | Undifferentiated |

MİC: minimum inhibitory concentration, FIKI: fractional inhibitor concentration index, Met: metformin

**Supplementary table A5.** MIC values and synergy test results of levofloxacin and metformin

| **Isolate number** | **MİC value (µg/mL)** | | | | **FICI** | **Result** |
| --- | --- | --- | --- | --- | --- | --- |
| **Levofloxacin** | **Met** | **Levofloxacin in combination** | **Metformin in combination** |
| 1 | 1 | >512 | 1 | >512 | 2 | Undifferentiated |
| 2 | 1 | >512 | 1 | >512 | 2 | Undifferentiated |
| 3 | 16 | >512 | 16 | >512 | 2 | Undifferentiated |
| 4 | 1 | >512 | 0.5 | 8 | 0.52 | Partial sinergy |
| 5 | 16 | >512 | 16 | >512 | 2 | Undifferentiated |
| 6 | 0.5 | >512 | 0.25 | >512 | 1.5 | Undifferentiated |
| 7 | 1 | >512 | 0.5 | >512 | 1.5 | Undifferentiated |
| 8 | 16 | >512 | 16 | >512 | 2 | Undifferentiated |
| 9 | 0.5 | >512 | 0.25 | 32 | 0.56 | Partial sinergy |
| 10 | 8 | >512 | 8 | >512 | 2 | Undifferentiated |
| 11 | 16 | >512 | 0.5 | 64 | 0.16 | **Sinergy** |
| 12 | 16 | >512 | 16 | >512 | 2 | Undifferentiated |
| 13 | 16 | >512 | 16 | >512 | 2 | Undifferentiated |
| 14 | 2 | >512 | 2 | >512 | 2 | Undifferentiated |
| 15 | 0.06 | >512 | 0.06 | 4 | 1.01 | Undifferentiated |
| 16 | 0.5 | >512 | 0.5 | >512 | 2 | Undifferentiated |
| 17 | 0.5 | >512 | 0.5 | >512 | 1 | Partial sinergy |
| 18 | 2 | >512 | 2 | >512 | 2 | Undifferentiated |
| 19 | 16 | >512 | 16 | >512 | 2 | Undifferentiated |
| 20 | 16 | >512 | 16 | >512 | 2 | Undifferentiated |
| 21 | 16 | >512 | 16 | >512 | 2 | Undifferentiated |
| 22 | 16 | >512 | 16 | >512 | 2 | Undifferentiated |
| 23 | 16 | >512 | 1 | >512 | 1.06 | Undifferentiated |
| 24 | 2 | >512 | 0.5 | 256 | 0.75 | Partial sinergy |
| 25 | 0.125 | >512 | 0.03 | 16 | 3.125 | Undifferentiated |
| 26 | 1 | >512 | 1 | >512 | 2 | Undifferentiated |
| 27 | 1 | >512 | 0,5 | 128 | 0.75 | Partial sinergy |
| 28 | 16 | >512 | 16 | >512 | 2 | Undifferentiated |
| 29 | 8 | >512 | 8 | >512 | 2 | Undifferentiated |
| 30 | 4 | >512 | 4 | >512 | 2 | Undifferentiated |
| 31 | 0.5 | >512 | 0.5 | >512 | 2 | Undifferentiated |
| 32 | 8 | >512 | 8 | >512 | 2 | Undifferentiated |
| 33 | 16 | >512 | 16 | >512 | 2 | Undifferentiated |
| 34 | 16 | >512 | 16 | >512 | 2 | Undifferentiated |
| 35 | 1 | >512 | 1 | >512 | 2 | Undifferentiated |
| 36 | 0.5 | >512 | 0.5 | >512 | 2 | Undifferentiated |
| 37 | 1 | >512 | 1 | >512 | 2 | Undifferentiated |
| 38 | 0,5 | >512 | 0.5 | >512 | 2 | Undifferentiated |
| 39 | 0.5 | >512 | 0.5 | >512 | 2 | Undifferentiated |
| 40 | 16 | >512 | 16 | >512 | 2 | Undifferentiated |
| 41 | 16 | >512 | 16 | >512 | 2 | Undifferentiated |
| 42 | 2 | >512 | 2 | >512 | 2 | Undifferentiated |
| 43 | 0.125 | >512 | 0.125 | >512 | 2 | Undifferentiated |
| 44 | 1 | >512 | 0,5 | >512 | 1.5 | Undifferentiated |
| 45 | 16 | >512 | 16 | >512 | 2 | Undifferentiated |
| 46 | 1 | >512 | 1 | >512 | 2 | Undifferentiated |
| 47 | 1 | >512 | 0.5 | 128 | 0.75 | Partial sinergy |
| 48 | 0.5 | >512 | 0.5 | >512 | 2 | Undifferentiated |
| 49 | 16 | >512 | 16 | >512 | 2 | Undifferentiated |
| 50 | 8 | >512 | 8 | >512 | 2 | Undifferentiated |

MİC: minimum inhibitory concentration, FIKI: fractional inhibitor concentration index, Met: metformin
